# Supplementary material for: Seventeen Ustilaginaceae High-Quality Genome Sequences Allow Phylogenomic Analysis and Provide Insights into Secondary Metabolite Synthesis
Source: MDPI journal article supplement (doi:10.3390/jof8030269), 2022-03-08
Supplement: s1 [file s1]

## Supplementary materials

### Supplementary figures

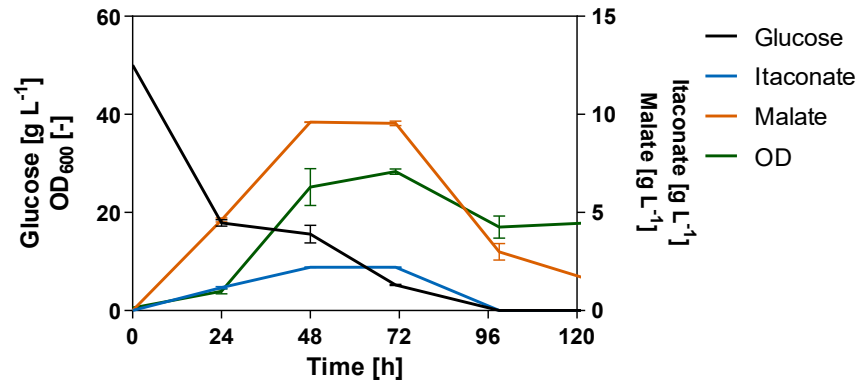

**Figure S1 Shake flask cultivation experiment of *M. mackinlayi* BRIP 52549a.** Growth via OD<sub>600</sub> measurement (green line), glucose concentration (black line), malate production (orange line) and itaconate production (blue line) are visualized during small scale (50 ml) cultivation experiment using MTM medium and 50 g L<sup>-1</sup> glucose and 0.8 g L<sup>-1</sup> NH<sub>4</sub>Cl. Error bars indicate the deviation from the mean for n=3.

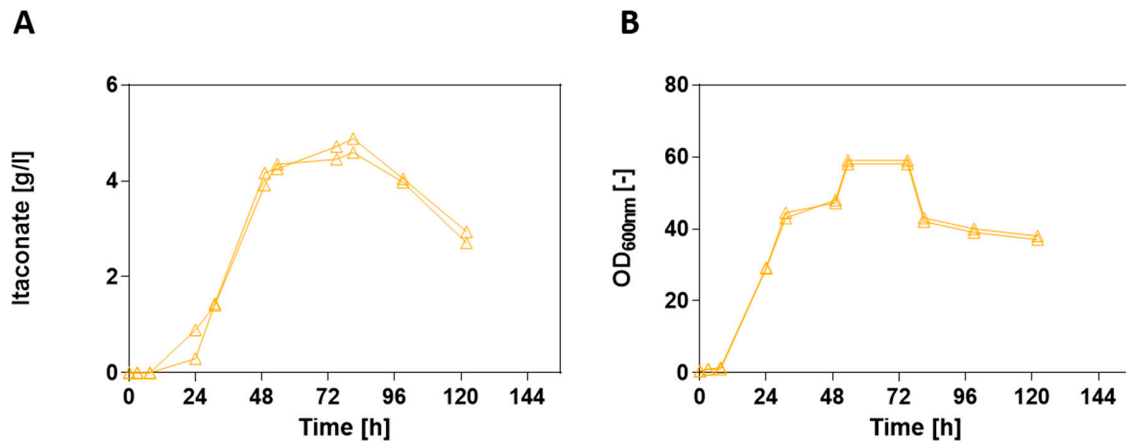

**Figure S2 Controlled-batch fermentation of *U. maydis* No. 512.** A: Itaconate production and B: growth via OD<sub>600</sub> measurement on in a bioreactor containing MTM medium using 50 g L<sup>-1</sup> glucose, 6.25 g L<sup>-1</sup>, 0.8 g L<sup>-1</sup> NH<sub>4</sub>Cl, 80% DOT, at pH 6.5 [1].

## Supplementary tables

**Table S1 Ustilaginaceae strains screened in this study.** Numbers (#) indicate the strain number.

| No.   | Strain                               |                                                   | Origin                                                      |
|-------|--------------------------------------|---------------------------------------------------|-------------------------------------------------------------|
| #2169 | <i>Ustilago maydis</i>               | Nr. 482                                           | Prof. M. Bölker,<br>Philipps University<br>Marburg, Germany |
| #2172 | <i>Ustilago maydis</i>               | Nr. 485                                           |                                                             |
| #2136 | <i>Ustilago maydis</i>               | Nr. 198                                           |                                                             |
| #2212 | <i>Sporisorium exsertum</i>          | RK 033                                            | CBS 133249                                                  |
| #2213 | <i>Sporisorium scitamineum</i>       | UMa698, Sscl4, JS109, RK 109,<br>Mating type MAT1 | CBS 131457                                                  |
| #2214 | <i>Sporisorium walkeri</i>           | RK 031                                            | CBS 131462                                                  |
| #2215 | <i>Ustanciosporium gigantosporum</i> | UMa706                                            | CBS 131464                                                  |
| #2220 | <i>Ustilago vetiveriae</i>           | RK 075                                            | CBS 131474                                                  |
| #2701 | <i>Ustilago trichophora</i>          |                                                   | NBRC 100157                                                 |
| #2706 | <i>Ustilago cynodontis</i>           |                                                   | NBRC 9727                                                   |
| #2708 | <i>Ustilago rabenhorstiana</i>       |                                                   | NBRC 8995                                                   |
| #1946 | <i>Pseudozyma antarctica</i>         |                                                   | NRRL Y - 808                                                |
| #2814 | <i>Macalpinomyces mackinlayi</i>     | BRIP 52549 a                                      | Queensland Plant<br>Pathology Herbarium,<br>Australia       |
| #2816 | <i>Macalpinomyces ordensis</i>       | BRIP 26904 a                                      |                                                             |
| #2821 | <i>Ustilago curta</i>                | BRIP 26929 a                                      |                                                             |
| #2826 | <i>Ustilago lituana</i>              | BRIP 46795 a                                      |                                                             |
| #2836 | <i>Ustilago xerochloae</i>           | BRIP 60876 a                                      |                                                             |

#### **Supplementary references**

1. Ullmann, L.; Phan, A.N.T.; Kaplan, D.K.P.; Blank, L.M. Ustilaginaceae Biocatalyst for Co-Metabolism of CO<sub>2</sub>-Derived Substrates toward Carbon-Neutral Itaconate Production. *J. Fungi* **2021**, *7*, 98.
